# Supplementary material for: Synthesis, single crystal structure and performance of N-substituted derivatives of dinitroimidazole
Source: Royal Society of Chemistry journal article supplement (doi:10.1039/c3nj00521f), 2013-01-01
Supplement: c3nj00521f.pdf [file c3nj00521f.pdf]

# Synthesis, single crystal structure and performance of *N*-Substituted Derivatives of dinitroimidazole

Kehui Hou<sup>a,★</sup>, Congming Ma<sup>a,★</sup>, and Zuliang Liu<sup>a,\*</sup>

## New Journal of Chemistry

### 1. List of Spectroscopic Data

### 2. List of Tables

1. Selected bond lengths and bond angles for the Compound **1**.
2. Selected bond lengths and bond angles for the Compound **3**.
3. Selected bond lengths and bond angles for the Compound **4**.
4. Selected bond lengths and bond angles for the Compound **5**.
5. Selected bond lengths and bond angles for the Compound **6**.
6. Total energy ( $E_0$ ) at the B3LYP/6-31G\* level and experimental gas phase HOFs for the reference compounds.
7. Calculated total energies ( $E_0$ ), gas phase HOFs ( $\Delta_f H^0_{\text{Gas}}$ ) for dinitroimidazole derivatives.

### 3. List of Figure Captions

1. Molecular structure of Compound **1**.
2. Crystal packing diagram for compound **1**.
3. Molecular structure of Compound **3**.
4. Crystal packing diagram for compound **3**.
5. Molecular structure of Compound **4**.
6. Crystal packing diagram for compound **4**.
7. Molecular structure of Compound **5**.
8. Crystal packing diagram for compound **5**.
9. Molecular structure of Compound **6**.
10. Crystal packing diagram for compound **6**.
11. Isodesmic reactions for the benzotriazole derivatives.

---

\* Zuliang Liu. Tel.: + 86-25-8431-8865; fax: + 86-25-8431-5030; e-mail: liuzl@mail.njust.edu.cn. <sup>★</sup> These authors contributed equally to this work and should be considered co-first authors.

## 1. Spectroscopic data for dinitroimidazole derivatives:

### 1-(2',4',6'-Trinitrophenyl)-2,4-dinitroimidazole (1)

Yield: 57%; m.p. 255-258°C (237-240°C [1]); <sup>1</sup>H NMR (DMSO-d<sub>6</sub>): δ 9.06 (s, 2H), 8.99(s, 1H).

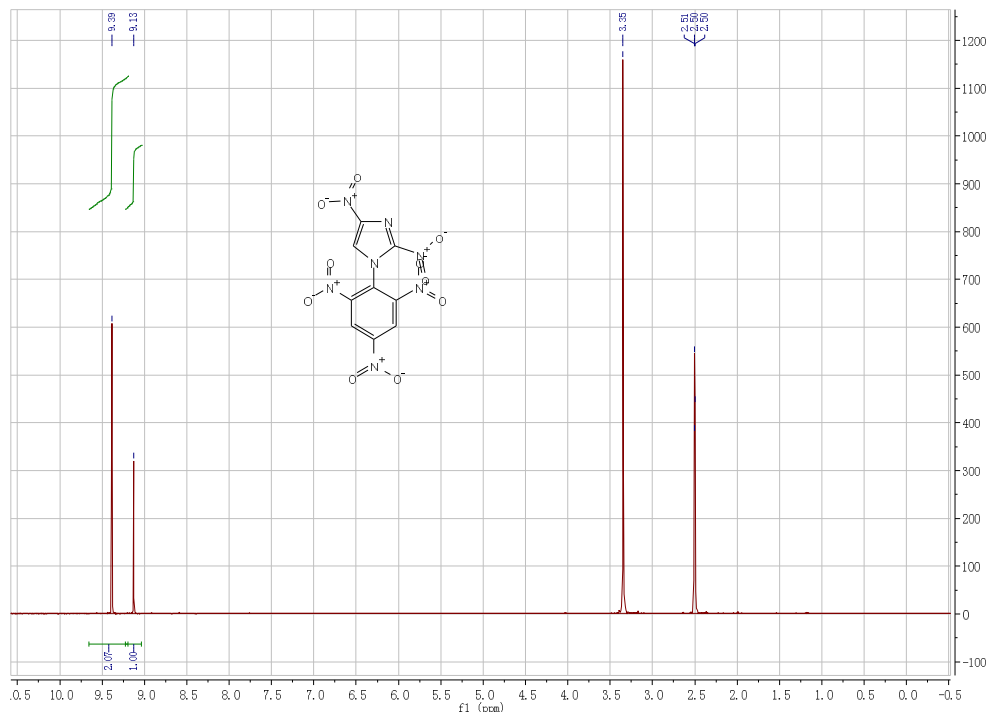

### 1-(3'-Amino-2',4',6'-Trinitrophenyl)-2,4-Dinitroimidazole (2)

Yield: 50%; m.p. 260-263°C; <sup>1</sup>H NMR (DMSO-d<sub>6</sub>): δ 8.92(s, 2H), 9.12(s, 1H), 9.16 (s, 1H); <sup>13</sup>C NMR (DMSO-d<sub>6</sub>): δ 125.45, 126.39, 127.14 127.50 127.78, 128.42, 132.46, 135.19, 140.84, 141.14, 143.60; Elemental analysis data obtained for C<sub>9</sub>H<sub>4</sub>N<sub>8</sub>O<sub>10</sub>: Calculated: C, 28.14; H, 1.05; N, 29.17; found: C, 28.22; H, 1.08; N, 29.21%. MS (ESI) m/z : 382.84 (M-H).

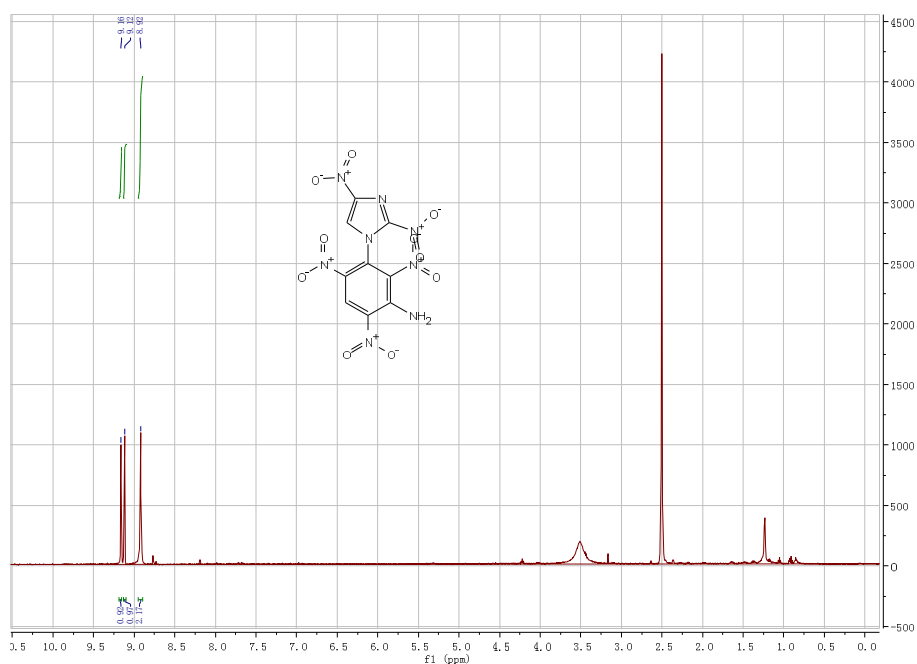

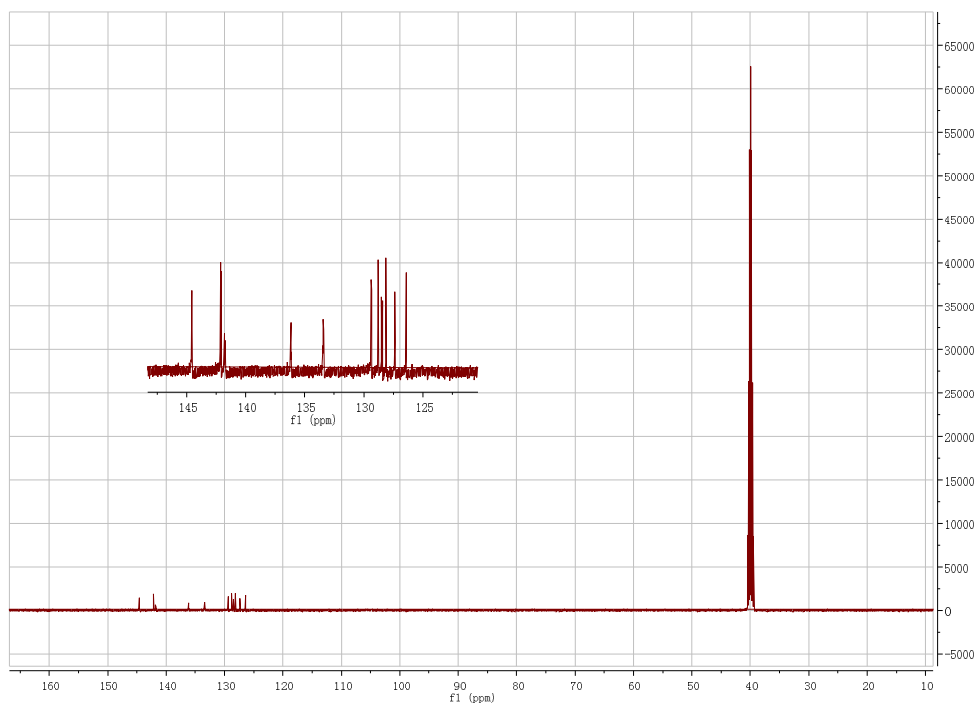

**1-(3',5'-diamino-2',4',6'-Trinitrophenyl)-2,4-Dinitroimidazole (3)**

Yield: 78%; m.p. 360-363 °C;  $^1\text{H}$  NMR (DMSO- $d_6$ ):  $\delta$  8.40 (s, 4H), 9.10 (s, 1H).  $^{13}\text{C}$  NMR (DMSO- $d_6$ )  $\delta$ : 121.60, 121.91, 124.76, 126.44, 129.31, 141.58, 143.35; Elemental analysis data obtained for  $\text{C}_9\text{H}_5\text{N}_9\text{O}_{10}$ : Calculated: C, 27.08; H, 1.26; N, 31.58; found: C, 27.11; H, 1.31; N, 31.62%. MS (ESI)  $m/z$ : 397.81 (M-H).

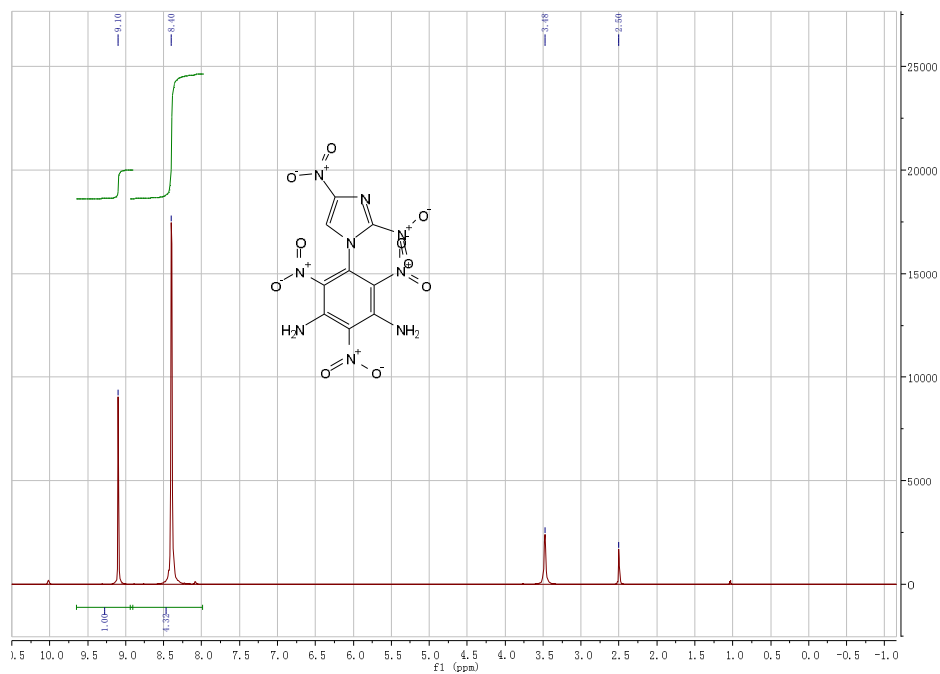

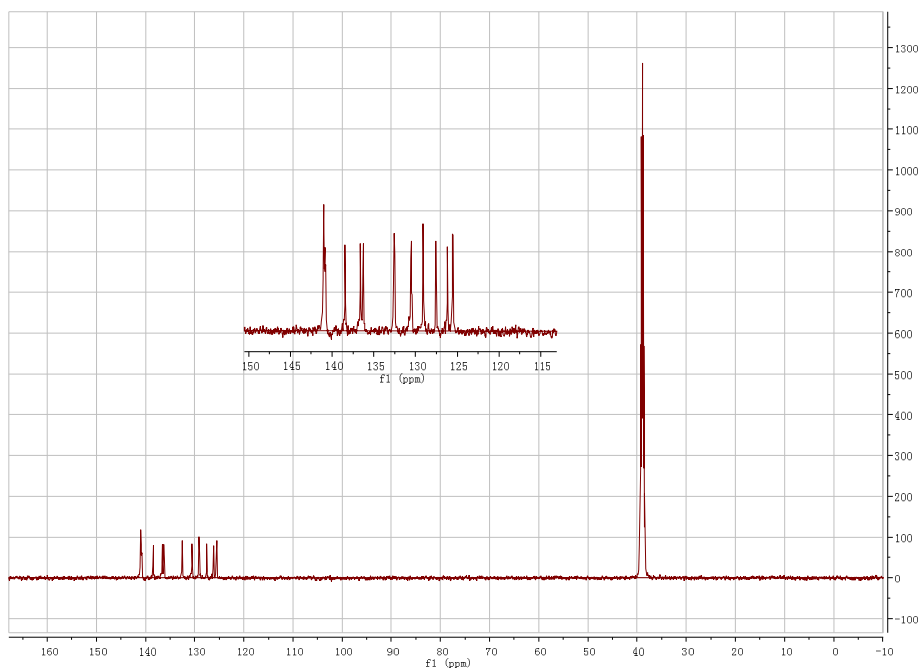

**1-(2',4',6'-Trinitrophenyl)-4,5-Dinitroimidazole (4)**

Yield: 65%; m.p. 226-229°C (220-223 °C <sup>[1]</sup>); <sup>1</sup>H NMR (DMSO-d<sub>6</sub>): δ 9.38 (s, 2H), 8.59 (s, 1H).

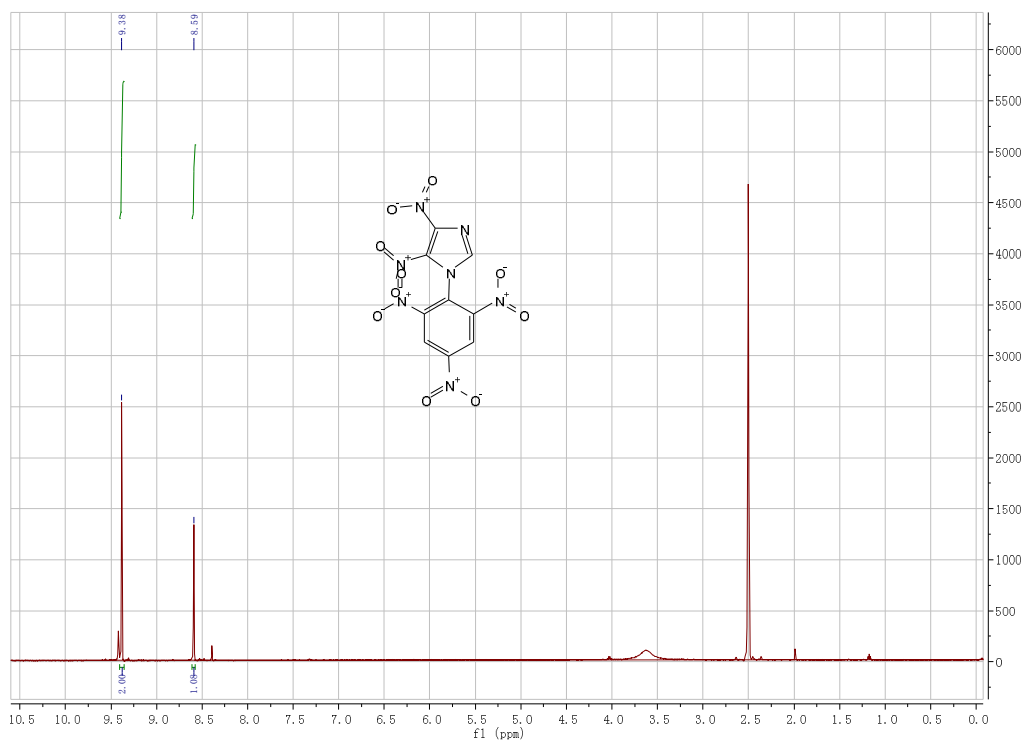

**1-(3'-Amino-2',4',6'-Trinitrophenyl)-4,5-Dinitroimidazole (5)**

Yield: 61%; m.p. 282-284°C; <sup>1</sup>H NMR (DMSO-d<sub>6</sub>): δ 8.57 (s, 1H), 8.92 (s, 2H), 9.15 (s, 1H); <sup>13</sup>C NMR (DMSO-d<sub>6</sub>): δ 125.52, 126.17, 127.56, 129.09, 130.53, 132.56, 136.44, 138.44, 140.93; Elemental analysis data obtained for C<sub>9</sub>H<sub>4</sub>N<sub>8</sub>O<sub>10</sub>: Calculated: C, 28.14; H, 1.05; N, 29.17; found: C, 28.22; H, 1.08; N, 29.21%. MS (ESI) m/z: 382.84 (M-H).

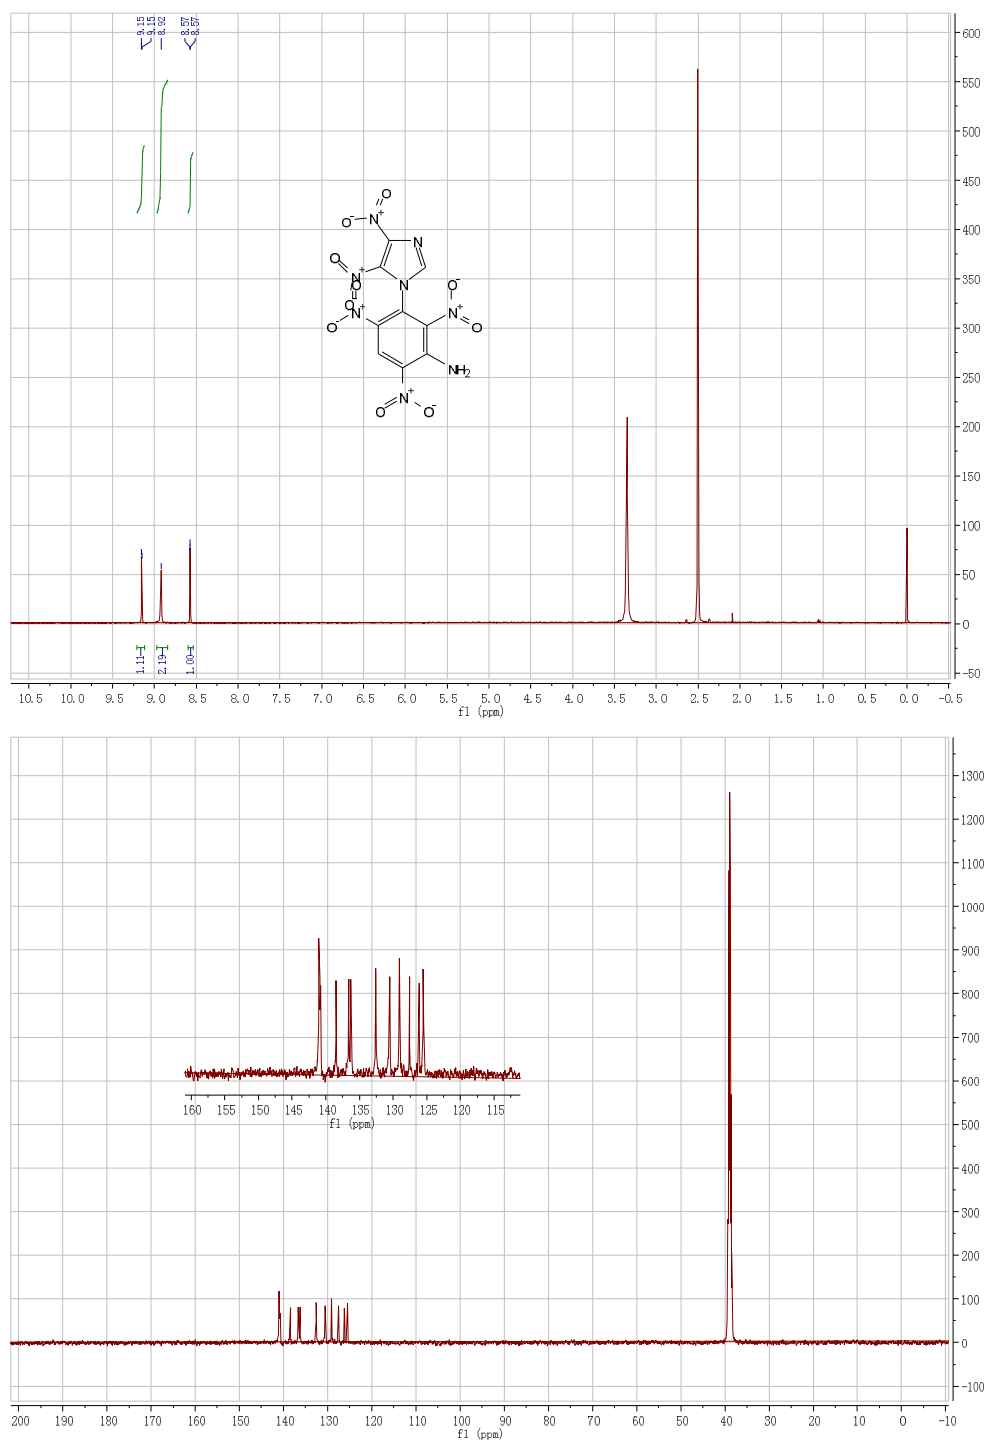

**1-(3',5'-diamino-2',4',6'-Trinitrophenyl)-4,5-Dinitroimidazole (6)**

Yield: 84%; m.p. 271-274°C; <sup>1</sup>H NMR (DMSO-d<sub>6</sub>): δ 8.35 (s, 4H), 8.55 (s, 1H). <sup>13</sup>C NMR (DMSO-d<sub>6</sub>) δ 121.81, 122.73, 127.17, 131.16, 136.07, 137.91, 140.69, 141.47, 146.18; Elemental analysis data obtained for C<sub>9</sub>H<sub>5</sub>N<sub>9</sub>O<sub>10</sub>: Calculated: C, 27.08; H, 1.26; N, 31.58; found: C, 27.11; H, 1.31; N, 31.62%. MS (ESI) m/z: 397.79 (M-H).

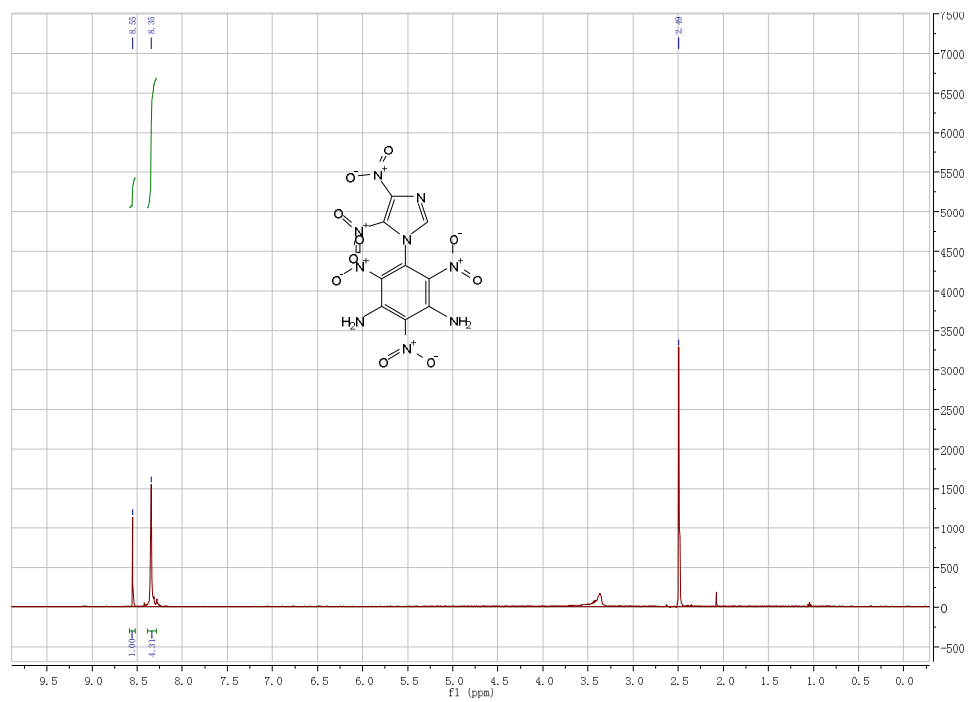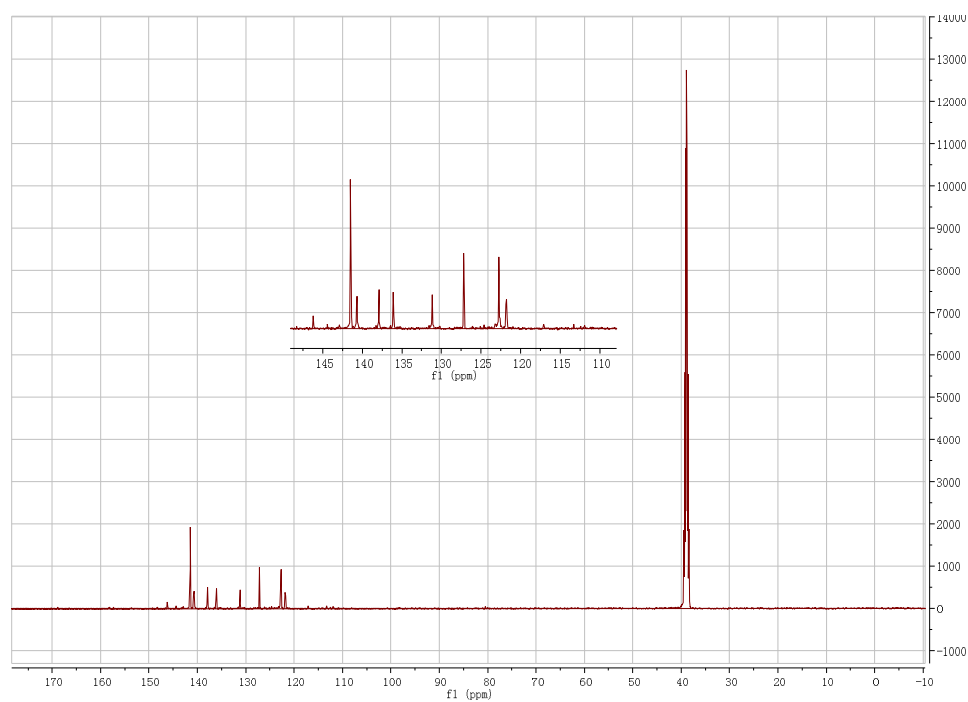

## Reference

- (1) W. S. Wilson. NAVAL AIR WARFARE CENTER WEAPONS DIV CHINA LAKE, 1994.

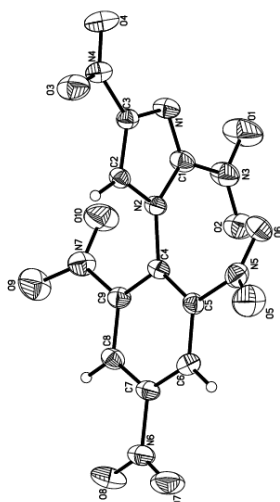

Fig. 1. Molecular structure of 1-(2',4',6'-Trinitrophenyl)-2,4-Dinitroimidazole (1)

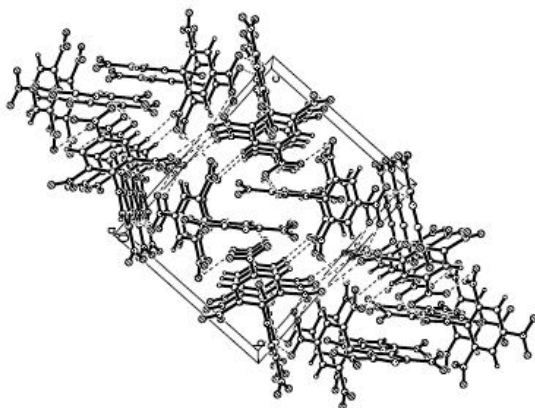

Fig. 2. Crystal packing of 1-(2',4',6'-Trinitrophenyl)-2,4-Dinitroimidazole (1)

Table 1. Selected Bond Lengths (Å) and Bond Angles (°)

| Bond         | Dist.    | Bond         | Dist.    | Bond          | Dist.    |
|--------------|----------|--------------|----------|---------------|----------|
| N(1)- C (1)  | 1.311(4) | C (3)- N (4) | 1.457(3) | N (6)- O (7)  | 1.212(3) |
| N(1)- C (3)  | 1.362(3) | O (3)- N (4) | 1.228(3) | N (6)- O (8)  | 1.223(3) |
| C(1)- N (2)  | 1.367(3) | C (4)- C (9) | 1.393(4) | N (6)- C (7)  | 1.478(3) |
| C(1)- N (3)  | 1.459(4) | C (4)- C (5) | 1.399(4) | C (6)- C (7)  | 1.386(4) |
| O(1)- N (3)  | 1.211(3) | N (4)- O (4) | 1.221(3) | C (7)- C (8)  | 1.391(4) |
| N(2)- C (2)  | 1.367(3) | N (5)- O (5) | 1.217(4) | N (7)- O (9)  | 1.207(3) |
| N (2)- C (4) | 1.453(3) | N (5)- O (6) | 1.223(3) | N (7)- O (10) | 1.220(3) |
| C (2)- C (3) | 1.364(4) | N (5)- C (5) | 1.488(3) | N (7)- C (9)  | 1.500(4) |
| O (2)- N (3) | 1.233(3) | C (5)- C (6) | 1.384(4) | C (8)- C (9)  | 1.390(4) |
| Angle        | (°)      | Angle        | (°)      | Angle         | (°)      |

|                     |          |                     |          |                     |          |
|---------------------|----------|---------------------|----------|---------------------|----------|
| C (1)- N (1)- C (3) | 103.3(2) | C (3)- C (2)- N (2) | 105.7(2) | C (4)- C (5)- N (5) | 120.3(2) |
| N (1)- C (1)- N (2) | 113.8(2) | N (1)- C (3)- C (2) | 111.9(2) | C (6)- C (7)- N (6) | 118.8(3) |
| N (1)- C (1)- N (3) | 125.4(2) | N (1)- C (3)- N (4) | 122.9(2) | C (8)- C (7)- N (6) | 117.7(2) |
| N (2)- C (1)- N (3) | 120.8(2) | C (2)- C (3)- N (4) | 125.2(2) | C (8)- C (9)- C (4) | 121.7(2) |
| C (2)- N (2)- C (1) | 105.3(2) | C (9)- C (4)- N (2) | 119.4(2) | C (8)- C (9)- N (7) | 117.1(2) |
| C (2)- N (2)- C (4) | 123.5(2) | C (5)- C (4)- N (2) | 121.3(2) | C (4)- C (9)- N (7) | 121.2(2) |
| C (1)- N (2)- C (4) | 131.2(2) | C (6)- C (5)- N (5) | 117.7(3) |                     |          |

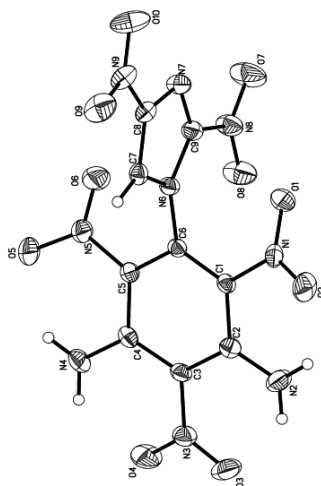

Fig. 3. Molecular structure of 1-(3',5'-diamino-2',4',6'-Trinitrophenyl)-2,4-Dinitroimidazole (3)

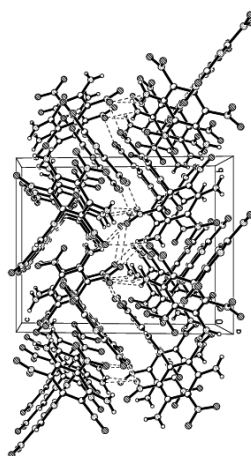

Fig. 4. Crystal packing of 1-(3',5'-diamino-2',4',6'-Trinitrophenyl)-2,4-Dinitroimidazole (3)

Table 2. Selected Bond Lengths (Å) and Bond Angles (°)

| Bond         | Dist.    | Bond         | Dist.    | Bond         | Dist.    |
|--------------|----------|--------------|----------|--------------|----------|
| N (1)- O (2) | 1.207(3) | C (3)- C (4) | 1.425(4) | N (7)- C (9) | 1.299(3) |
| N (1)- O (1) | 1.223(3) | N (4)- C (4) | 1.323(3) | N (7)- C (8) | 1.359(3) |
| N (1)- C (1) | 1.445(3) | C (4)- C (5) | 1.432(4) | O (7)- N (8) | 1.202(3) |
| C (1)- C (6) | 1.378(3) | C (5)- C (6) | 1.380(3) | C (8)- N (9) | 1.436(3) |



| C (1)- C (2)      | 1.436(3) | C (5)- N (5)      | 1.454(3) | O (8)- N (8)      | 1.219(3) |
|-------------------|----------|-------------------|----------|-------------------|----------|
| C (2)- N (2)      | 1.320(3) | N (5)- O (6)      | 1.214(3) | N (8)- C (9)      | 1.440(4) |
| C (2)- C (3)      | 1.427(4) | N (5)- O (5)      | 1.232(3) | N (9)- O (10)     | 1.209(3) |
| N (3)- O (3)      | 1.220(3) | N (6)- C (7)      | 1.363(3) | N (9)- O (9)      | 1.221(3) |
| N (3)- O (4)      | 1.226(3) | N (6)- C (9)      | 1.365(3) |                   |          |
| N (3)- C (3)      | 1.443(3) | N (6)- C (6)      | 1.441(3) |                   |          |
| Angle             | (°)      | Angle             | (°)      | Angle             | (°)      |
| C (6)-C (1)-N (1) | 119.6(2) | C (6)-C (5)-N (5) | 118.9(2) | C (9)-N (7)-C (8) | 102.3(2) |
| C (2)-C (1)-N (1) | 119.8(2) | C (4)-C (5)-N (5) | 120.0(2) | C (8)-C (7)-N (6) | 104.1(2) |
| N (2)-C (2)-C (3) | 122.9(3) | C (7)-N (6)-C (9) | 106.0(2) | C (7)-C (8)-N (7) | 113.5(2) |
| N (2)-C (2)-C (1) | 120.1(2) | C (7)-N (6)-C (6) | 122.7(2) | C (7)-C (8)-N (9) | 125.2(3) |
| C (4)-C (3)-N (3) | 118.4(2) | C (9)-N (6)-C (6) | 131.1(2) | N (7)-C (8)-N (9) | 121.2(2) |
| C (2)-C (3)-N (3) | 119.0(2) | C (1)-C (6)-C (5) | 121.8(2) | N (7)-C (9)-N (6) | 114.1(2) |
| N (4)-C (4)-C (3) | 123.2(2) | C (1)-C (6)-N (6) | 119.6(2) | N (7)-C (9)-N (8) | 123.9(3) |
| N (4)-C (4)-C (5) | 120.3(2) | C (5)-C (6)-N (6) | 117.8(2) | N (6)-C (9)-N (8) | 122.0(2) |

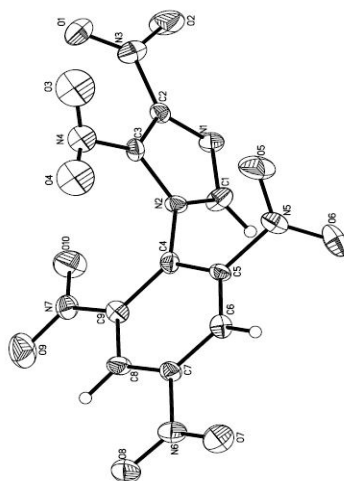

Fig. 5. Molecular structure of 1-(2',4',6'-Trinitrophenyl)-4,5-Dinitroimidazole (4)

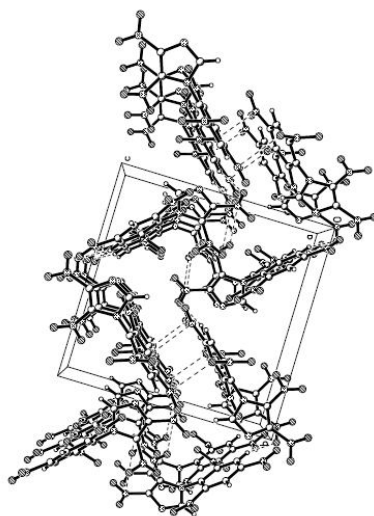

Fig. 6. Crystal packing of 1-(2',4',6'-Trinitrophenyl)-4,5-Dinitroimidazole (4)

**Table 3. Selected Bond Lengths (Å) and Bond Angles (°)**

| Bond           | Dist.    | Bond           | Dist.    | Bond           | Dist.    |
|----------------|----------|----------------|----------|----------------|----------|
| N(1)-C(1)      | 1.319(7) | C(3)-N(4)      | 1.500(8) | N(6)-O(7)      | 1.207(7) |
| N(1)-C(2)      | 1.337(7) | O(3)-N(4)      | 1.098(7) | N(6)-O(8)      | 1.207(7) |
| O(1)-N(3)      | 1.190(7) | N(4)-O(4)      | 1.024(7) | N(6)-C(7)      | 1.477(7) |
| C(1)-N(2)      | 1.366(7) | C(4)-C(5)      | 1.398(8) | C(6)-C(7)      | 1.352(8) |
| N(2)-C(3)      | 1.366(7) | C(4)-C(9)      | 1.436(8) | N(7)-O(10)     | 1.201(7) |
| N(2)-C(4)      | 1.449(7) | N(5)-O(6)      | 1.224(7) | N(7)-O(9)      | 1.233(7) |
| C(2)-C(3)      | 1.356(8) | N(5)-O(5)      | 1.227(6) | N(7)-C(9)      | 1.426(7) |
| C(2)-N(3)      | 1.445(7) | N(5)-C(5)      | 1.470(7) | C(7)-C(8)      | 1.382(8) |
| O(2)-N(3)      | 1.227(7) | C(5)-C(6)      | 1.364(8) | C(8)-C(9)      | 1.380(8) |
| Angle          | (°)      | Angle          | (°)      | Angle          | (°)      |
| C(1)-N(1)-C(2) | 104.7(4) | N(1)-C(2)-C(3) | 112.7(5) | N(2)-C(3)-N(4) | 121.3(5) |
| N(1)-C(1)-N(2) | 111.0(5) | N(1)-C(2)-N(3) | 119.5(5) | C(6)-C(5)-N(5) | 118.4(5) |
| C(1)-N(2)-C(3) | 106.9(5) | C(3)-C(2)-N(3) | 127.3(5) | C(4)-C(5)-N(5) | 119.0(5) |
| C(1)-N(2)-C(4) | 123.9(5) | C(2)-C(3)-N(2) | 104.4(5) | C(8)-C(7)-N(6) | 117.7(5) |
| C(3)-N(2)-C(4) | 128.4(5) | C(2)-C(3)-N(4) | 134.0(5) | C(8)-C(9)-N(7) | 120.8(5) |

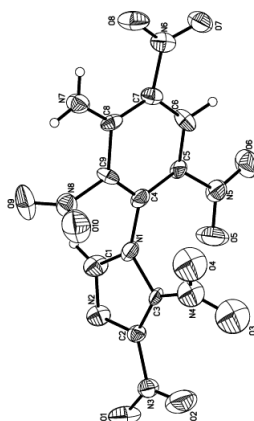

**Fig. 7. Molecular structure of 1-(3'-Amino-2',4',6'-Trinitrophenyl)-4,5-Dinitroimidazole (5)**

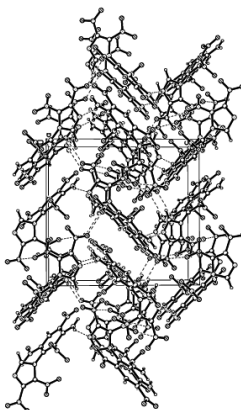

**Fig. 8. Crystal packing of 1-(3'-Amino-2',4',6'-Trinitrophenyl)-4,5-Dinitroimidazole (5)**

**Table 4.** Selected Bond Lengths (Å) and Bond Angles (°)

| Bond                | Dist.     | Bond                | Dist.     | Bond                | Dist.     |
|---------------------|-----------|---------------------|-----------|---------------------|-----------|
| N (1)- C (1)        | 1.402(11) | C (3)- N (4)        | 1.406(13) | C (6)- C (7)        | 1.409(13) |
| N (1)- C (3)        | 1.405(9)  | O (3)- N (4)        | 1.250(12) | N (6)- O (8)        | 1.214(10) |
| N (1)- C (4)        | 1.467(11) | C (4)- C (5)        | 1.372(12) | N (6)- O (7)        | 1.232(11) |
| O (1)- N (3)        | 1.212(10) | C (4)- C (9)        | 1.387(12) | N (6)- C (7)        | 1.476(11) |
| C (1)- N (2)        | 1.323(11) | N (4)- O (4)        | 1.162(12) | N (8)- O (9)        | 1.185(11) |
| N (2)- C (2)        | 1.375(10) | C (5)- C (6)        | 1.357(12) | N (8)- O (10)       | 1.241(11) |
| C (2)- C (3)        | 1.329(11) | C (5)- N (5)        | 1.516(11) | N (8)- C (9)        | 1.440(12) |
| C (2)- N (3)        | 1.457(10) | O (5)- N (5)        | 1.268(12) | C (8)- N (7)        | 1.335(10) |
| O (2)- N (3)        | 1.204(11) | N (5)- O (6)        | 1.188(10) | C (8)- C (9)        | 1.470(11) |
| Angle               | (°)       | Angle               | (°)       | Angle               | (°)       |
| N (2)- C (2)- N (3) | 118.5(8)  | N (2)- C (2)- N (3) | 118.5(8)  | C (6)- C (5)- N (5) | 117.5(8)  |
| C (2)- C (3)- N (1) | 107.5(8)  | C (2)- C (3)- N (1) | 107.5(8)  | C (4)- C (5)- N (5) | 122.3(8)  |
| C (2)- C (3)- N (4) | 136.0(8)  | C (2)- C (3)- N (4) | 136.0(8)  | C (8)- C (7)- N (6) | 121.4(9)  |
| N (1)- C (3)- N (4) | 116.2(8)  | N (1)- C (3)- N (4) | 116.2(8)  | C (6)- C (7)- N (6) | 116.9(9)  |
| N (2)- C (2)- N (3) | 118.5(8)  | C (5)- C (4)- C (9) | 118.6(9)  | N (7)- C (8)- C (7) | 126.5(8)  |
| C (2)- C (3)- N (1) | 107.5(8)  | C (5)- C (4)- N (1) | 123.2(9)  | N (7)- C (8)- C (9) | 120.4(8)  |
| C (2)- C (3)- N (4) | 136.0(8)  | C (9)- C (4)- N (1) | 118.2(8)  | C (4)- C (9)- N (8) | 120.0(8)  |

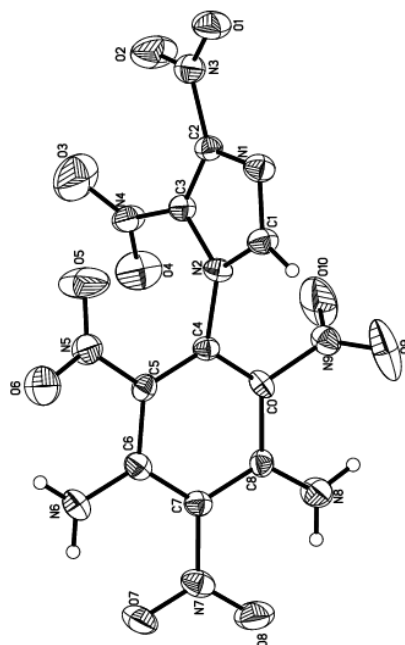

**Fig. 9.** Molecular structure of 1-(3',5'-diamino-2',4',6'-Trinitrophenyl)-4,5-Dinitroimidazole (6)

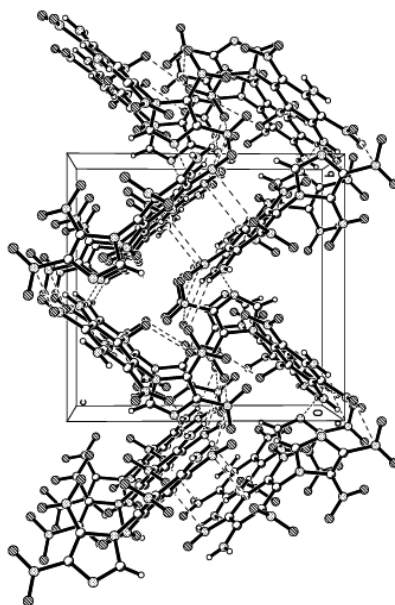

Fig. 10. Crystal packing of 1-(3',5'-diamino-2',4',6'-Trinitrophenyl)-4,5-Dinitroimidazole (6)

Table 5. Selected Bond Lengths (Å) and Bond Angles (°)

| Bond              | Dist.    | Bond              | Dist.    | Bond              | Dist.    |
|-------------------|----------|-------------------|----------|-------------------|----------|
| C (0)-C (4)       | 1.363(7) | C (2)-N (3)       | 1.472(7) | C (6)-N (6)       | 1.346(7) |
| C (0)-C (8)       | 1.443(8) | O (2)-N (3)       | 1.211(7) | N (7)-O (8)       | 1.216(7) |
| C (0)-N (9)       | 1.462(7) | C (3)-N (4)       | 1.463(7) | N (7)-O (7)       | 1.242(7) |
| C (1)-N (1)       | 1.310(7) | O (3)-N (4)       | 1.195(8) | N (7)-C (7)       | 1.443(7) |
| C (1)-N (2)       | 1.367(7) | C (4)-C (5)       | 1.392(7) | C (7)-C (8)       | 1.432(8) |
| N (1)-C (2)       | 1.366(7) | N (4)-O (4)       | 1.173(7) | C (8)-N (8)       | 1.313(7) |
| O (1)-N (3)       | 1.217(6) | C (5)-C (6)       | 1.436(8) | N (9)-O (10)      | 1.182(8) |
| N (2)-C (3)       | 1.406(7) | C (5)-N (5)       | 1.451(7) | N (9)-O (9)       | 1.200(7) |
| N (2)-C (4)       | 1.443(7) | N (5)-O (5)       | 1.187(7) |                   |          |
| C (2)-C (3)       | 1.345(7) | N (5)-O (6)       | 1.209(7) |                   |          |
| Angle             | (°)      | Angle             | (°)      | Angle             | (°)      |
| C (4)-C (0)-N (9) | 118.8(5) | C (3)-C (2)-N (3) | 128.2(5) | C (6)-C (5)-N (5) | 120.8(5) |
| C (8)-C (0)-N (9) | 117.4(5) | N (1)-C (2)-N (3) | 119.9(5) | N (6)-C (6)-C (7) | 119.9(5) |
| N (1)-C (1)-N (2) | 112.2(5) | C (2)-C (3)-N (2) | 105.0(4) | N (6)-C (6)-C (5) | 120.8(6) |
| C (1)-N (1)-C (2) | 105.2(4) | C (2)-C (3)-N (4) | 134.6(5) | C (6)-C (7)-N (7) | 121.8(5) |
| C (1)-N (2)-C (3) | 105.7(4) | N (2)-C (3)-N (4) | 120.4(5) | C (8)-C (7)-N (7) | 116.7(5) |
| C (1)-N (2)-C (4) | 125.5(4) | C (0)-C (4)-N (2) | 116.0(5) | N (8)-C (8)-C (7) | 125.1(5) |
| C (3)-N (2)-C (4) | 128.6(5) | C (5)-C (4)-N (2) | 122.8(5) | N (8)-C (8)-C (0) | 119.7(5) |
| C (3)-C (2)-N (1) | 111.9(4) | C (4)-C (5)-N (5) | 120.2(5) | C (7)-C (8)-C (0) | 115.1(5) |

**Table 6.** Total energy ( $E_0$ ) at the B3LYP/6-31G\* level and experimental gas phase HOFs for the reference compounds.

| Compd.                          | $E_0$ (au)   | HOF (kJ/mol) |
|---------------------------------|--------------|--------------|
| CH <sub>4</sub>                 | -40.524195   | -74.6        |
| NH <sub>3</sub>                 | -56.5577686  | -46.1        |
| CH <sub>3</sub> NH <sub>2</sub> | -95.863686   | -22.5        |
| CH <sub>3</sub> NO <sub>2</sub> | -245.0133753 | -80.6        |
| Imidazole                       | -226.2230978 | 132.9        |
| Benzene                         | -232.2582055 | 82.9         |

**Table 7.** Calculated total energies ( $E_0$ ), gas phase HOFs ( $\Delta_f H^0_{\text{Gas}}$ ) for dinitroimidazole derivatives.

| Compd | Molecular Formula                                            | M. W. (g/mol) | $E_0$ (au)   | $\Delta_f H^0_{\text{Gas}}$ (kJ/mol) |
|-------|--------------------------------------------------------------|---------------|--------------|--------------------------------------|
| 1     | C <sub>9</sub> H <sub>3</sub> N <sub>7</sub> O <sub>10</sub> | 368.9941      | -1479.71023  | 485.1016                             |
| 2     | C <sub>9</sub> H <sub>4</sub> N <sub>8</sub> O <sub>10</sub> | 384.005       | -1535.082987 | 213.3052                             |
| 3     | C <sub>9</sub> H <sub>5</sub> N <sub>9</sub> O <sub>10</sub> | 399.0159      | -1590.45327  | 180.4869                             |
| 4     | C <sub>9</sub> H <sub>3</sub> N <sub>7</sub> O <sub>10</sub> | 368.9941      | -1479.700703 | 277.1873                             |
| 5     | C <sub>9</sub> H <sub>4</sub> N <sub>8</sub> O <sub>10</sub> | 384.005       | -1535.074468 | 236.0061                             |
| 6     | C <sub>9</sub> H <sub>5</sub> N <sub>9</sub> O <sub>10</sub> | 399.0159      | 1590.443908  | 205.3951                             |

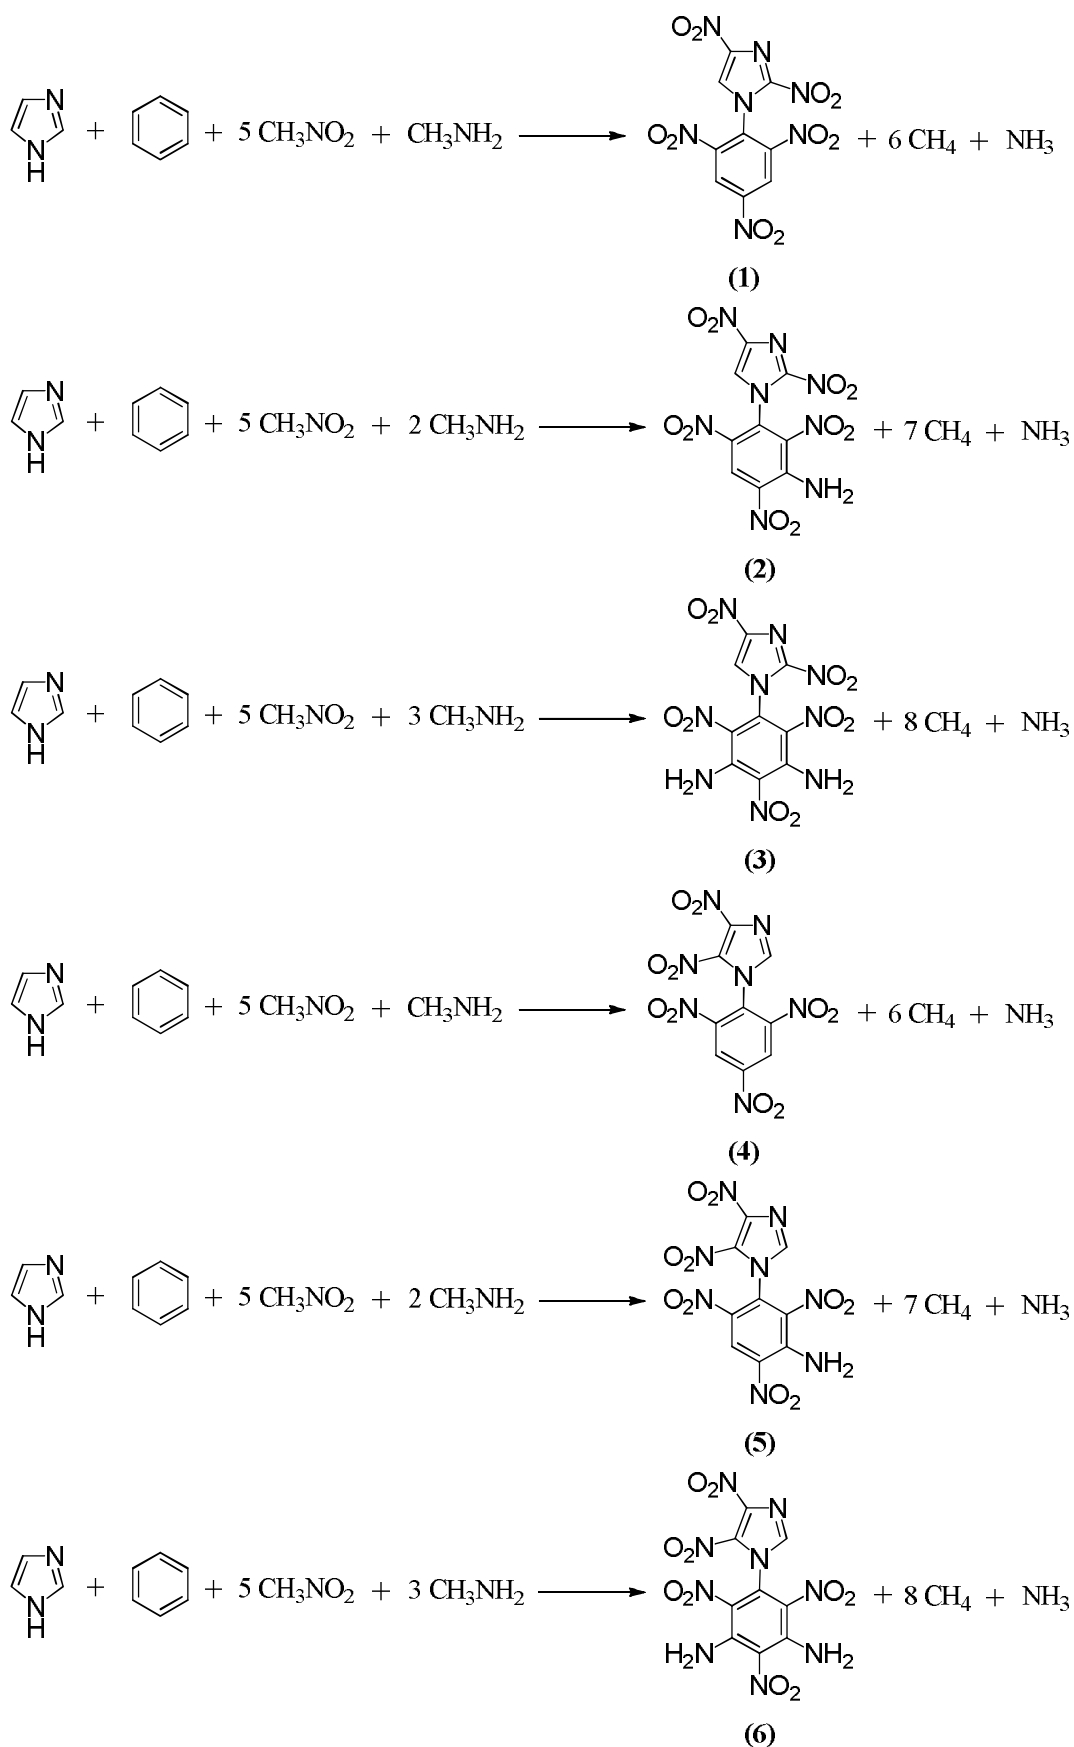

Fig. 11. Isodesmic reactions for the dinitroimidazole derivatives
